# Supplementary material for: Synthesis, structure, and surface photovoltage properties of a series of novel d7–d10 metal complexes with pincer N-heterocycle ligands
Source: Royal Society of Chemistry journal article supplement (doi:10.1039/c3ra41459k), 2013-01-01
Supplement: c3ra41459k.pdf [file c3ra41459k.pdf]

# Synthesis, structure, and surface photovoltage properties of a series of novel $d^7$ - $d^{10}$ metal complexes with pincer N-heterocycle ligands

Xuan Wang<sup>a</sup>, Yong Heng Xing<sup>a\*</sup>, Feng Ying Bai<sup>b\*</sup>, Xin Yu Wang<sup>a</sup>, Qing Lin Guan<sup>a</sup>, Ya Nan Hou<sup>a</sup>, Rui Zhang<sup>a</sup> and Zhan Shi<sup>c</sup>

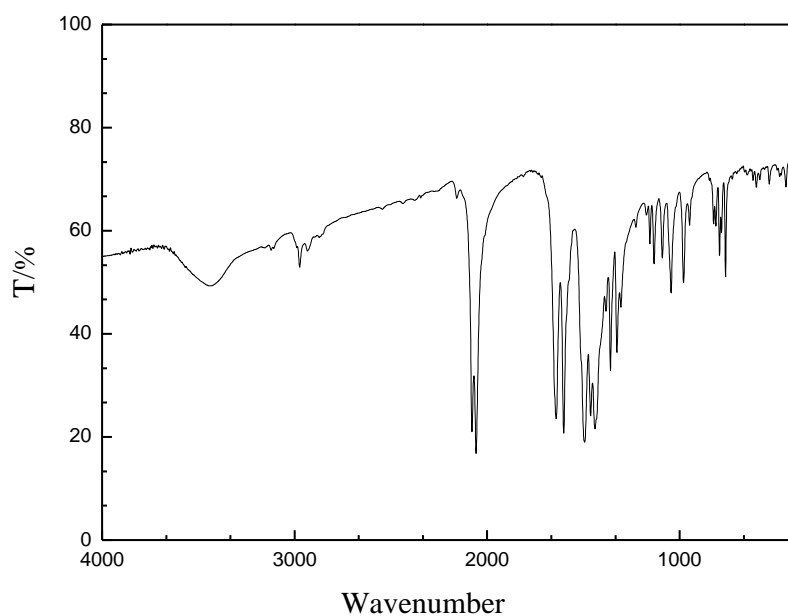

**Fig. S1** The Solid-state IR spectra of complex **1** at a room temperature

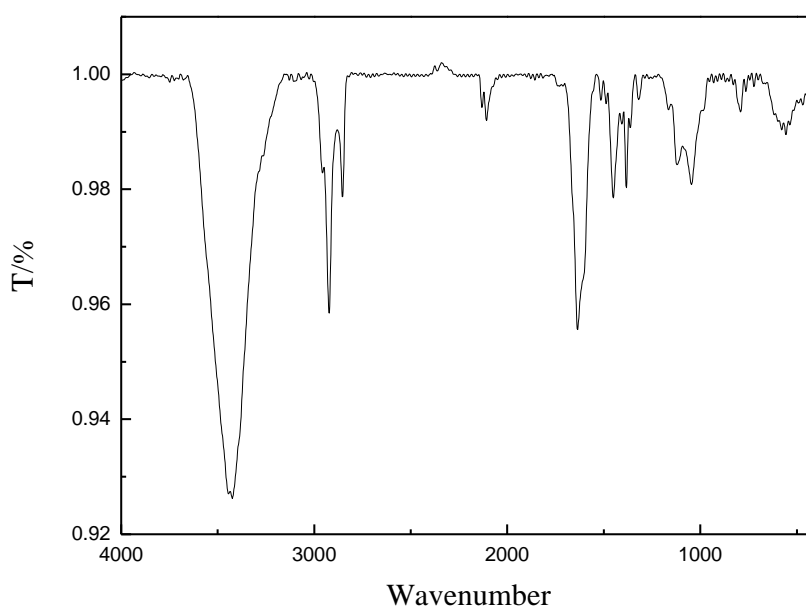

**Fig. S2** The Solid-state IR spectra of complex **2** at a room temperature

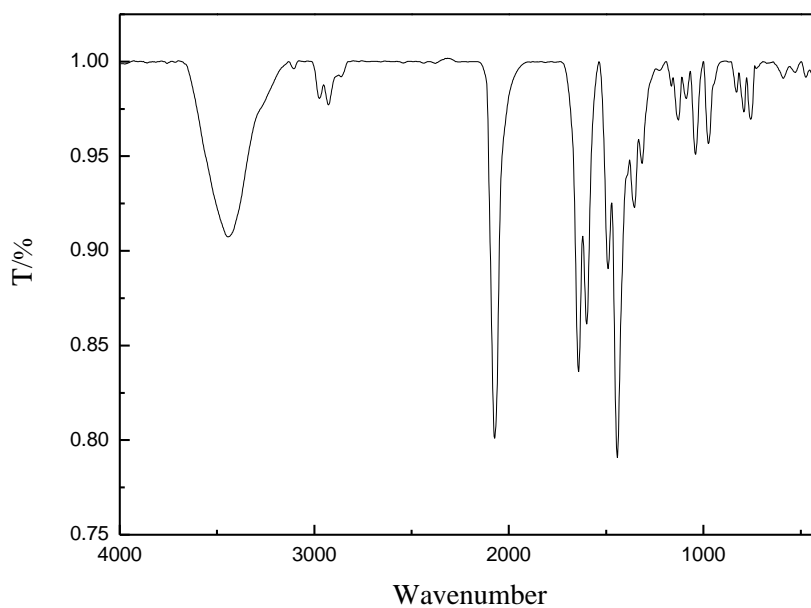

**Fig. S3** The Solid-state IR spectra of complex **3** at a room temperature

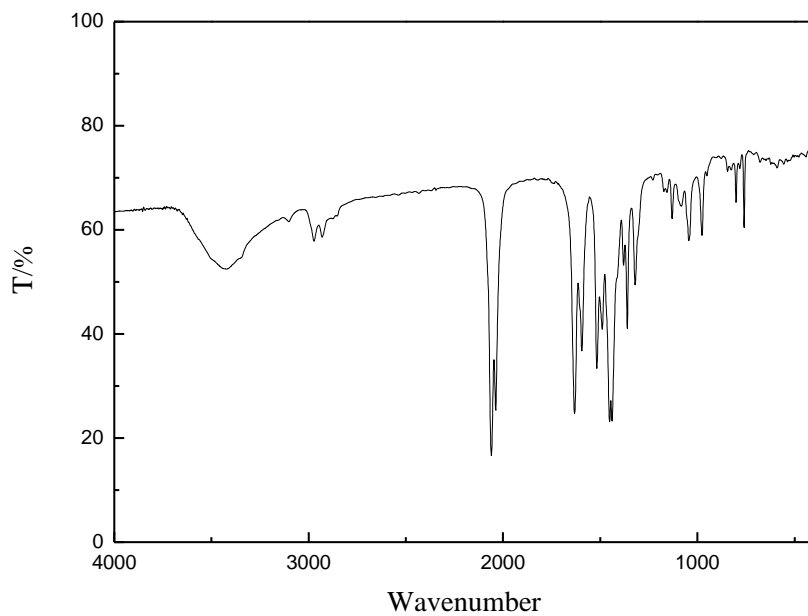

**Fig. S4** The Solid-state IR spectra of complex **4** at a room temperature

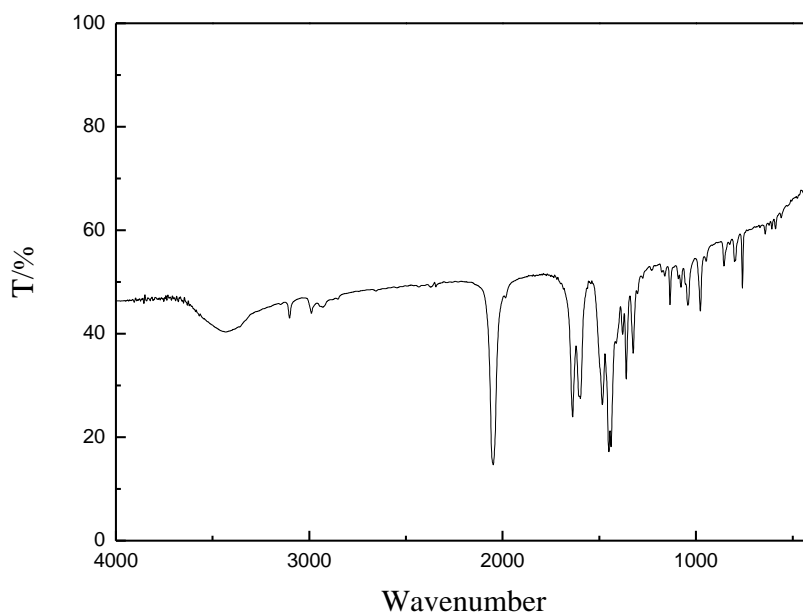

**Fig. S5** The Solid-state IR spectra of complex **5** at a room temperature

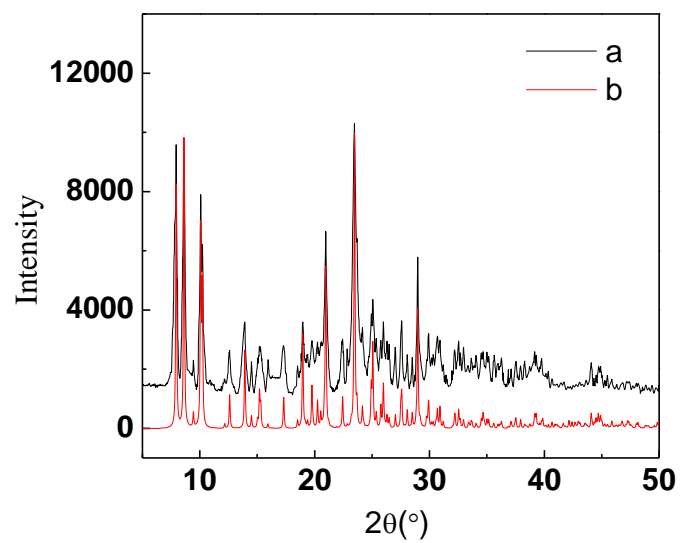

**Fig. S6** XRD spectrograms of complexes **1**

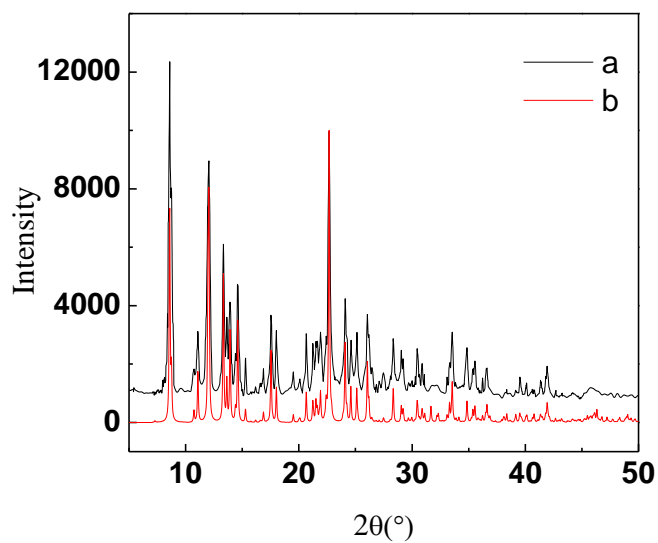

**Fig. S7** XRD spectrograms of complexes **2**

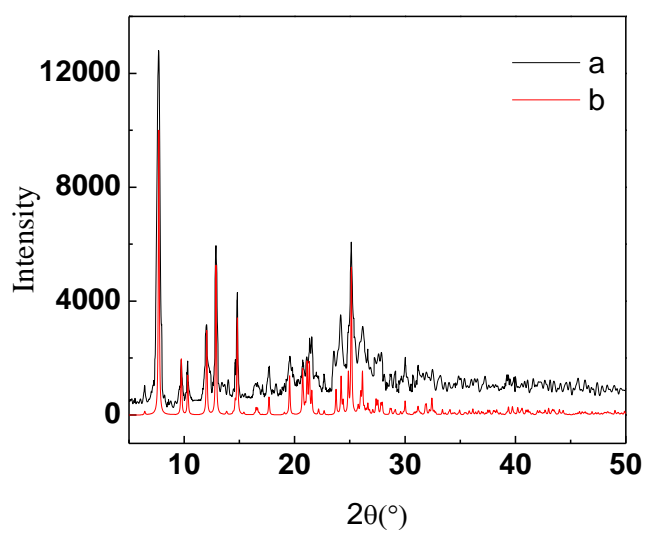

**Fig. S8** XRD spectrograms of complexes **3**

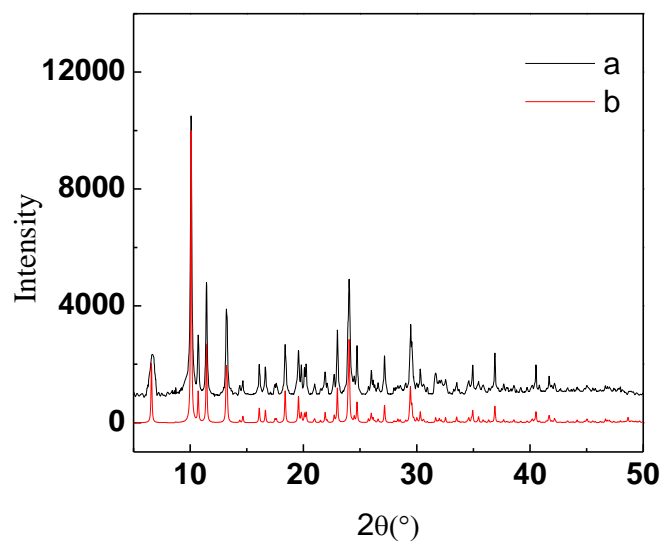

**Fig. S9** XRD spectrograms of complexes 4

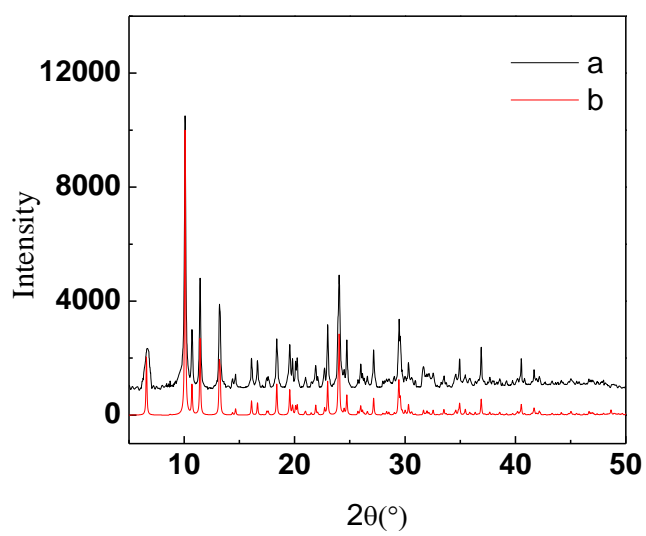

**Fig. S10** XRD spectrograms of complexes 5
